# Supplementary material for: Ultrasonication-promoted synthesis of luminescent sulfur nano-dots for cellular imaging applications
Source: Royal Society of Chemistry journal article supplement (doi:10.1039/c9cc06586e), 2019-01-01
Supplement: c9cc06586e1.pdf [file c9cc06586e1.pdf]

## Supporting Information

### Ultrasonication-Promoted Synthesis of Luminescent Sulfur Nanodots for Cellular Imaging Applications

Chuanchuan Zhang,<sup>1, ‡</sup> Peng Zhang,<sup>2, ‡</sup> Xiaojing Ji,<sup>3</sup> Henggang Wang,<sup>1</sup>  
Haizhu Kuang,<sup>2</sup> Weilin Cao,<sup>2</sup> Mingyue Pan,<sup>2</sup> Yu-e Shi,<sup>1,\*</sup> Zhenguang  
Wang<sup>1,\*</sup>

1. College of Chemistry and Environmental Science, Hebei University, Baoding 071002, Hebei, China
2. Shenzhen Luohu people's hospital, No. 47 Youyi Rd, Luohu, Shenzhen, China
3. College of Science and Technology, Agricultural University of Hebei, 061100 Huanghua, China

<sup>‡</sup>These authors contributed equally to this work.

## 1. EXPERIMENTAL SECTION

1.1. Materials. Sublimed sulfur (99.95%) and sodium sulfide nonahydrate ( $\text{Na}_2\text{S} \cdot 9\text{H}_2\text{O}$ ) were purchased from Aladdin. Polyethylene glycol 400 (PEG-400) was obtained from Tianjin GuangFu Fine Chemical Research Institute (Tianjin, China).

1.2 Synthesis of S-dots. Sublimated sulfur (0.1g), water (40 mL), PEG-400 (2.5mL), and 7.0 g  $\text{Na}_2\text{S} \cdot 9\text{H}_2\text{O}$  were mixed in a 100 mL beaker. The mixture was allowed to react for a period of time (3 h~12 h) under ultrasonication. Intense green emission appeared under the radiation of UV-light, suggesting the formation of S dots.

1.3 CCK-8 assay. EAS-2B cells were cultured in Dulbecco's Modified Eagle Medium [DMEM, Gibco (Carlsbad, CA, USA)] supplemented with 10% fetal bovine serum (Gibco) and 1% antibiotic-antimycotic (Gibco) in a humidified incubator at 37 °C with 5% (v/v)  $\text{CO}_2$  and 95% (v/v) air. Cells ( $5 \times 10^3$ /per well) were seeded in 96-well plate and grown for 24 h to reach 80-90% confluency. Cells were treated with fresh medium containing different volume of SQDs (1  $\mu\text{L}$ , 5  $\mu\text{L}$ , 10  $\mu\text{L}$ , 15  $\mu\text{L}$ , 20  $\mu\text{L}$ , 25  $\mu\text{L}$  and 30  $\mu\text{L}$ ) for 4, 8 and 24 h respectively. Washing the cells twice with phosphate-buffered saline solution (PBS). 100  $\mu\text{L}$  CCK-8 solution (Meilunbio, Dalian, China) was then added and incubated for 2 h. The absorbance of each well was measured by a microplate reader. The number of viable cells in different groups was compared with that in the control group.

1.4 Confocal microscopy assay. EAS-2B cells ( $5 \times 10^4$ /per dish) were seeded in a Live Cell Imaging Culture Dish (Meilunbio, Dalian, China) for 24 h. The cells were treated with fresh medium containing different concentrations of SQDs (1  $\mu\text{L}$ , 5  $\mu\text{L}$ , 10  $\mu\text{L}$ , 15  $\mu\text{L}$ , 20  $\mu\text{L}$ , 25  $\mu\text{L}$  and 30  $\mu\text{L}$ ) for 1 h. Washing the cells twice with PBS to remove the unbound SQDs. Bright field images and fluorescent images of cells were taken by a confocal microscopy (LSM800, Carl Zeiss, Germany) with excitation wavelength at 488 nm and emission wavelength at 509 nm.

1.5 Characterization. Spectrometer of UV-3600 (Shimadzu Japan) and F-7000 (Hitachi, Japan) were used to record the PL and UV-absorption spectra of S-dots. A FLS980 spectrometer (Edinburgh Instruments) equipped with an integrating sphere was employed to measure the time-resolved PL decay curves and absolute PL QY of S-dots. TEM images were acquired on a transmission electron microscopy (TEM; FEI Tecnai G2 F20 S-TWIN, FEI, USA). XPS spectra were collected on a photoelectron spectrometer (ESCALAB-MKII 250, Thermo, USA). Fourier transformed infrared (FTIR) spectra were recorded by a Nicolet IS10 FTIR spectrometer (Thermo, USA). The cell viability was calculated by comparing the absorption (450 nm) of 96-well plate by a microplate reader (Multiskan Go 1510, Thermo, USA) Ultrasonication treatment was carried out on an ultrasonic homogenizer (SCIENTZ-IID, SCIENTZ) working at 300 W.

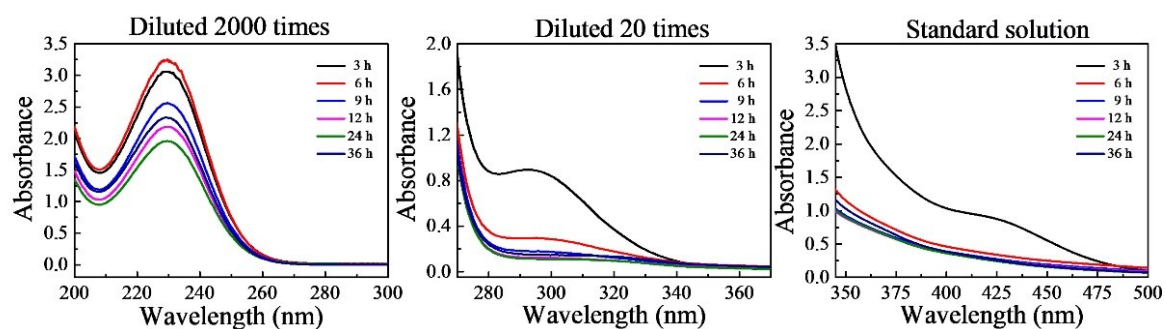

Figure S1. UV-vis absorption spectra of S-dots synthesized by different ultrasonication time, under different times of dilution.

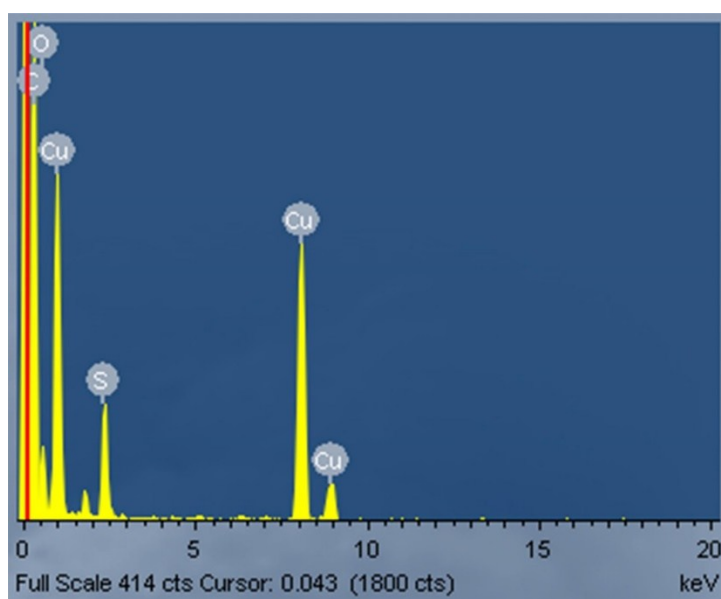

Figure S2. EDS spectrum of S-dots.

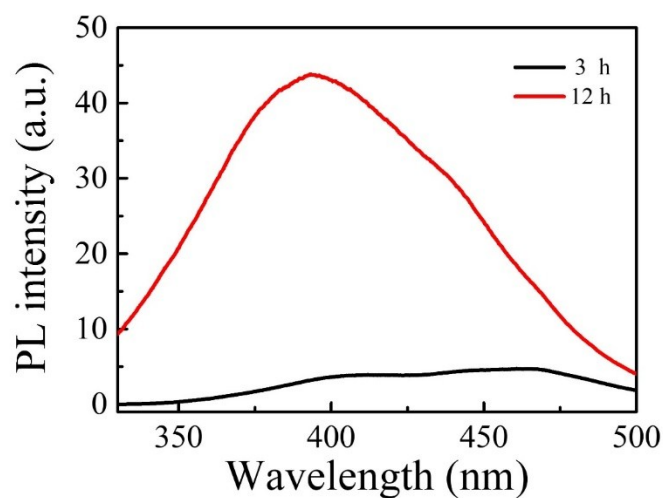

Figure S3. PLE spectra of S-dots synthesized by 3 h and 12 h ultrasonication.

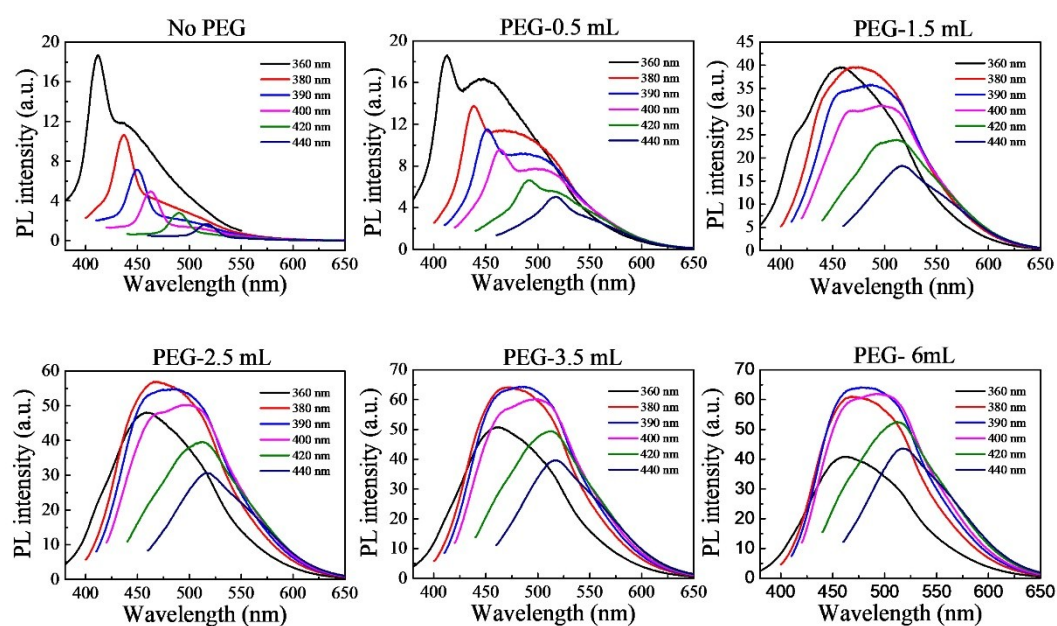

Figure S4. PL spectra of S-dots synthesized by adding different volume of PEG, as indicated on the frame.

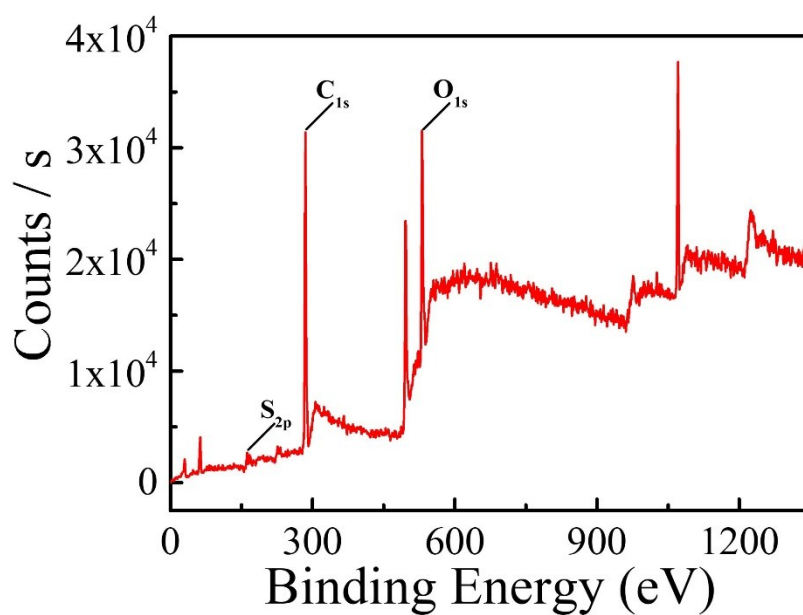

Figure S5. Full XPS spectrum of S-dots.

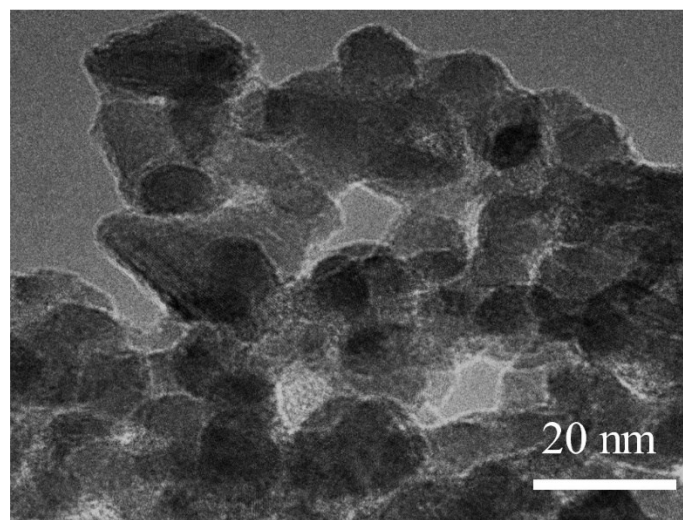

Figure S6. TEM image of S-dots synthesized without adding PEG.

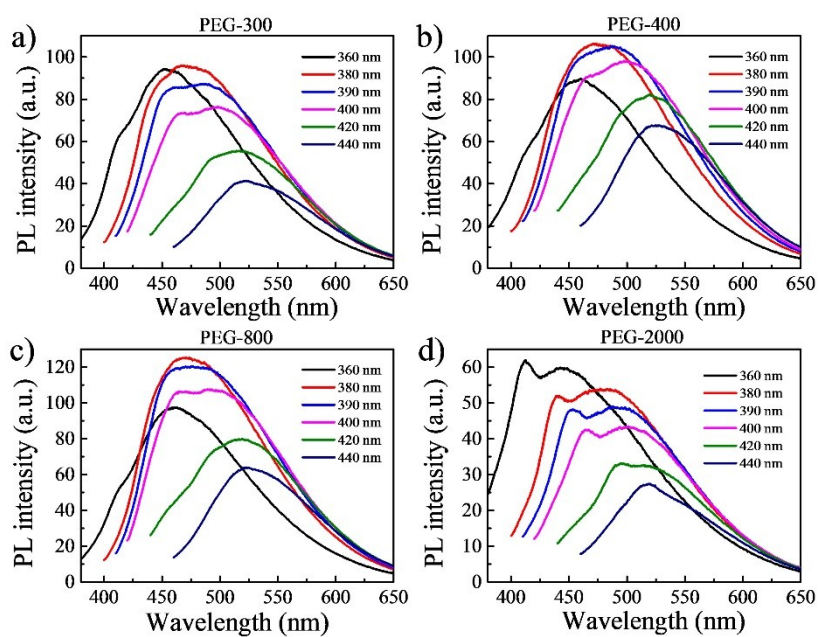

Figure S7. PL spectra of S-dots synthesized by using different chain length PEG, as indicated on the top of frame.

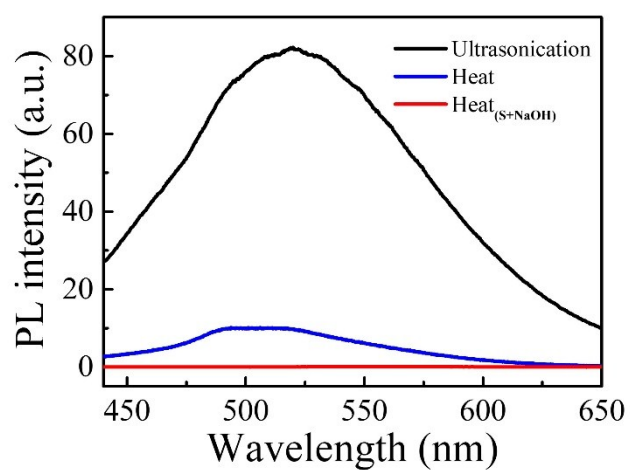

Figure S8. PL spectra (excited at 420 nm) of S-dots synthesized by ultrasonication, direct heating using  $\text{Na}_2\text{S}$  and bulk sulfur, together with using bulk sulfur and NaOH as raw materials.

h.
